# Supplementary material for: Boosting NAD level suppresses inflammatory activation of PBMCs in heart failure
Source: JCI journal article supplement (doi:10.1172/jci138538), 2020-08-13
Supplement: sd3 [file 3]

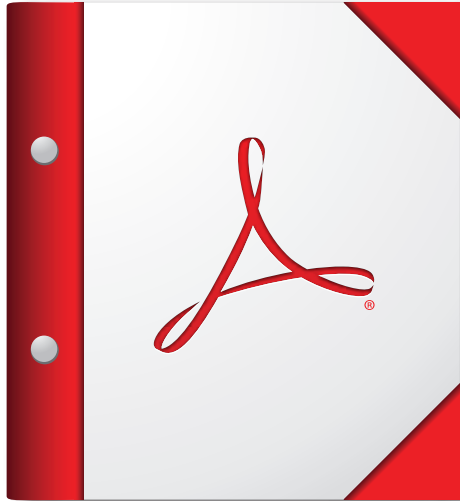

**For the best experience, open this PDF portfolio in  
Acrobat X or Adobe Reader X, or later.**

[Get Adobe Reader Now!](#)
